# Supplementary material
Source: PubMed Central journal article supplement (PMC3396515)
Supplement: 1202781109_pnas.201202781SI.pdf [file 1202781109_pnas.201202781SI.pdf]

# Supporting Information

Sawala et al. 10.1073/pnas.1202781109

## SI Materials and Methods

***dpp* mRNA Quantification in Transfected S2R<sup>+</sup> cells and in *st-dpp* Embryos.** RNA was extracted from S2R<sup>+</sup> cells transfected with pMT-Dpp-HA or pMT-Dpp-Δa-HA (see *Materials and Methods* for transfection methods) and from embryos derived from crossing *y<sup>67c23</sup>w<sup>118</sup>* females to *st2-dpp* or *st2-dpp-Δa* homozygous males using TRIzol (Life Technologies) according to the manufacturer's instructions. For RNA extraction from S2R<sup>+</sup> cells, two additional rounds of acid phenol extraction were included before RNA precipitation. RNA was treated with DNase I (Roche) for 30 min at room temperature, followed by DNase I inactivation by heat for 45 min at 75 °C. RNA extractions were performed in triplicate for each set of experiments.

From each RNA sample, cDNA was generated in duplicate (plus one no-reverse transcriptase control) by using eAMV reverse transcriptase (Sigma), oligo-dT<sub>23</sub> primers (Sigma), and

1 μg of total RNA. Quantitative PCR (qPCR) analysis was performed by using SYBR green on a Chromo 4 real-time PCR machine (MJ Research). Raw *dpp* or *st2-dpp* levels were normalized to the levels of the reference gene *rp49* measured in the same cDNA sample. The following primers were used for qPCR amplification:

RP49:

5'-CCCAAGGGTATCGACAACAGA-3' and 5'-CGATGT-TGGGCATCAGATACTG-3'

*dpp* (S2R<sup>+</sup> cells):

5'-GGCAAGGTGCCGAAGGCGTG-3' and 5'-GTCATCT-CCTGGTAGTTCTTCAG-3'

*st2-dpp* transgenes (embryos):

5'-GGGAAATCGCGAGCGAGAGAGCA-3' and 5'-ACAA-TCTTTTGGGGGAGCATGGGGG-3'

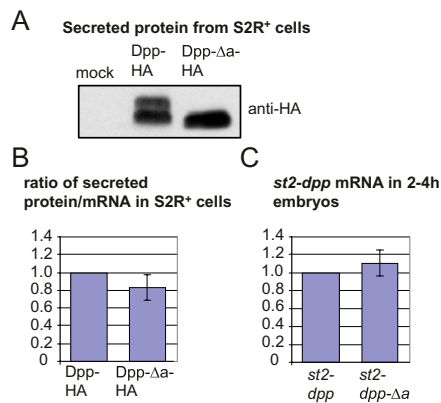

**Fig. S1.** Quantification of Dpp-Δa levels in tissue culture and 2- to 4-h embryos. (A and B) Expression of the same levels of *dpp*-HA and *dpp*-Δa-HA mRNA in S2R<sup>+</sup> cells results in equal extracellular accumulation of Dpp-HA and Dpp-Δa-HA protein in the supernatant. S2R<sup>+</sup> cells were transiently transfected with Copper-inducible vectors encoding Dpp-HA and Dpp-Δa-HA. The levels of secreted HA-tagged forms of Dpp-HA and Dpp-Δa-HA were quantified by Western blotting, with one representative blot shown in A. The level of *dpp* mRNA in transfected S2R<sup>+</sup> cells was quantified by qPCR and correlated with the resultant level of extracellular Dpp protein (B). The results indicate that expression levels of wild-type Dpp and Dpp-Δa are equivalent. Thus, the Δa mutation in *dpp* does not intrinsically affect any of the various stages of gene expression involved in production of Dpp protein. Results represent the mean of three independent experiments; error bar shows SEM. (C) Quantification of mRNA levels from *st2-dpp* and *st2-dpp-Δa* transgenes in 2- to 4-h embryos carrying one copy of the transgene in a wild-type background. mRNA levels were assessed by qPCR analysis by using primers specific for the *st2-dpp* transgenes. Graph shows the mean of three independent experiments; error bar is SEM. The results demonstrate that *st2-dpp* and *st2-dpp-Δa* embryos analyzed in Fig. 4 express similar levels of *dpp* mRNA from the transgene. In conjunction with the tissue culture data (A and B), these results suggest that Dpp and Dpp-Δa extracellular protein levels are similar in *st2-dpp* and *st2-dpp-Δa* embryos.
